# Supplementary material
Source: PubMed Central journal article supplement (PMC9246254)

# ESM Appendix S1. ROB 2 Bias Assessment

| Study                  | Randomization process | Deviations from intended intervention | Missing outcome data | Measurement of the outcome | Selection of the reported result | Overall |
|------------------------|-----------------------|---------------------------------------|----------------------|----------------------------|----------------------------------|---------|
| Alajmi et al.          | 1                     | +                                     | +                    | +                          | +                                | +       |
| Balaguera-Cortes et    | 1                     | +                                     | +                    | +                          | +                                | +       |
| Bishop et al.          | 1                     | +                                     | +                    | +                          | +                                | +       |
| Broom et al. 2007      | 1                     | +                                     | +                    | +                          | +                                | +       |
| Broom et al. 2009      | 1                     | +                                     | +                    | +                          | +                                | +       |
| Broom et al. 2017      | 1                     | +                                     | +                    | +                          | +                                | +       |
| Burn et al.            | 1                     | +                                     | +                    | +                          | +                                | +       |
| Crabtree et al.        | 1                     | +                                     | +                    | +                          | +                                | +       |
| Dorling et al.         | 1                     | +                                     | +                    | +                          | +                                | +       |
| Douglas et al.         | 1                     | +                                     | +                    | +                          | +                                | +       |
| Erdmann et al.         | 1                     | +                                     | +                    | +                          | +                                | +       |
| Gholipour et al.       | 1                     | +                                     | +                    | +                          | +                                | +       |
| Hagobian et al.        | 1                     | +                                     | +                    | +                          | +                                | +       |
| Kawano et al.          | 1                     | +                                     | +                    | +                          | +                                | +       |
| Kelly et al.           | 1                     | +                                     | +                    | +                          | +                                | +       |
| King et al. 2010 a     | 1                     | +                                     | +                    | +                          | +                                | +       |
| King et al. 2010 b     | 1                     | +                                     | +                    | +                          | +                                | +       |
| Larsen et al.          | 1                     | +                                     | +                    | +                          | +                                | +       |
| Mattin et al.          | 1                     | +                                     | +                    | +                          | +                                | +       |
| Metcalfe et al.        | 1                     | +                                     | +                    | +                          | +                                | +       |
| Stokes et al.          | 1                     | +                                     | +                    | +                          | +                                | +       |
| Tiryaki-Sonmez et al.  | +                     | +                                     | +                    | +                          | +                                | +       |
| Vatansever-Ozen et al. | +                     | +                                     | +                    | +                          | +                                | +       |
| Wasse et al.           | +                     | +                                     | +                    | +                          | +                                | +       |

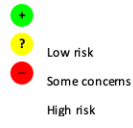

Supplement: NIHMS1815279-supplement-ESM_Appendix_S1__ROB_2_Bias_Assessment.pdf [file NIHMS1815279-supplement-ESM_Appendix_S1__ROB_2_Bias_Assessment.pdf]
