# Supplementary material
Source: PubMed Central journal article supplement (PMC9246254)

**ESM Appendix S2.** Cook's Distance depicting Study #9 (Dorling et al. 2019) as an influential study

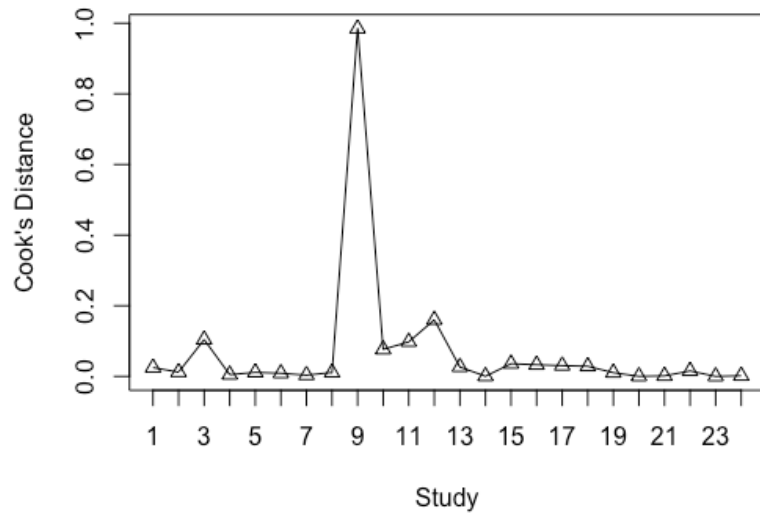

Supplement: NIHMS1815279-supplement-ESM_Appendix_S2__Cook_s.pdf [file NIHMS1815279-supplement-ESM_Appendix_S2__Cook_s.pdf]
